# Supplementary material for: The Preparation and Performance Study of Polyamide Film Based on PDA@MWCNTs/PVDF Porous Support Layer
Source: MDPI journal article supplement (doi:10.3390/molecules29071460), 2024-03-25
Supplement: s1 [file s1]

## 1. Supplementary figure

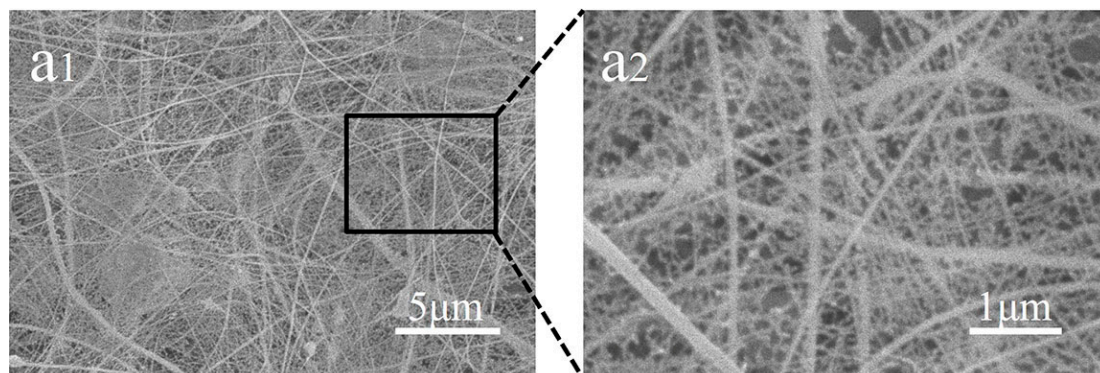

Supplementary **Figure S1.** (a1, a2) Tree-like nanofiber membrane SEM images.

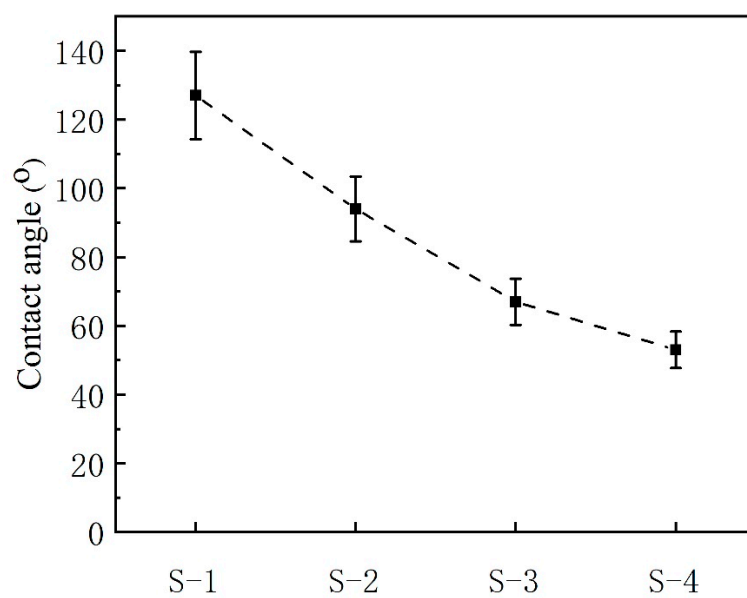

Supplementary **Figure S2.** The contact angle of various support layer.

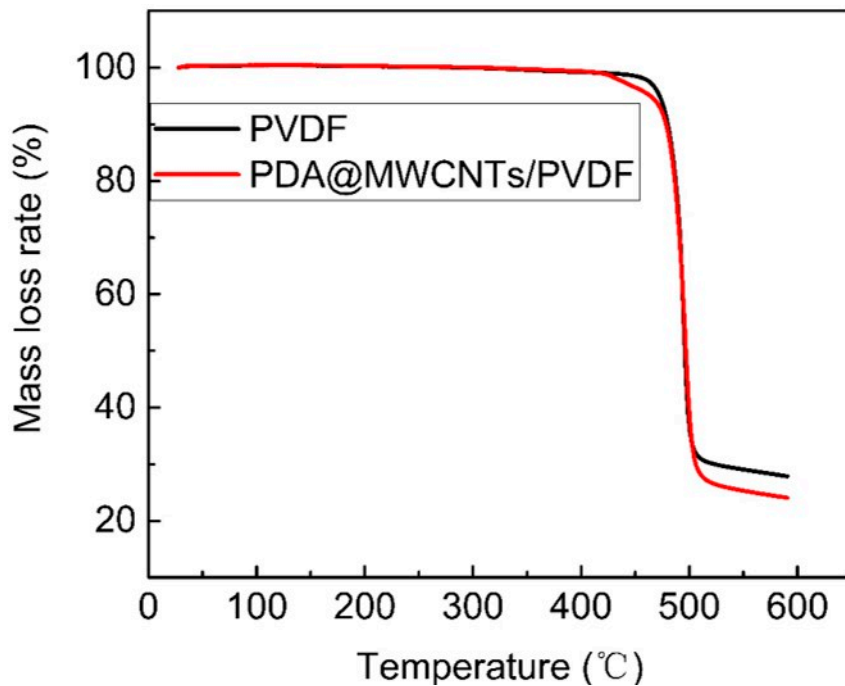

Supplementary **Figure S3**. TG curves of PVDF nanofiber membrane and PDA@MWCNTs/PVDF membrane.

The thermal stability of PA TFC membrane is a crucial indicator in practical application. The TG curves (Supplementary Figure S2) indicates the nanofiber membrane and PDA@MWCNTs membrane both keep excellent stability under 400 °C.

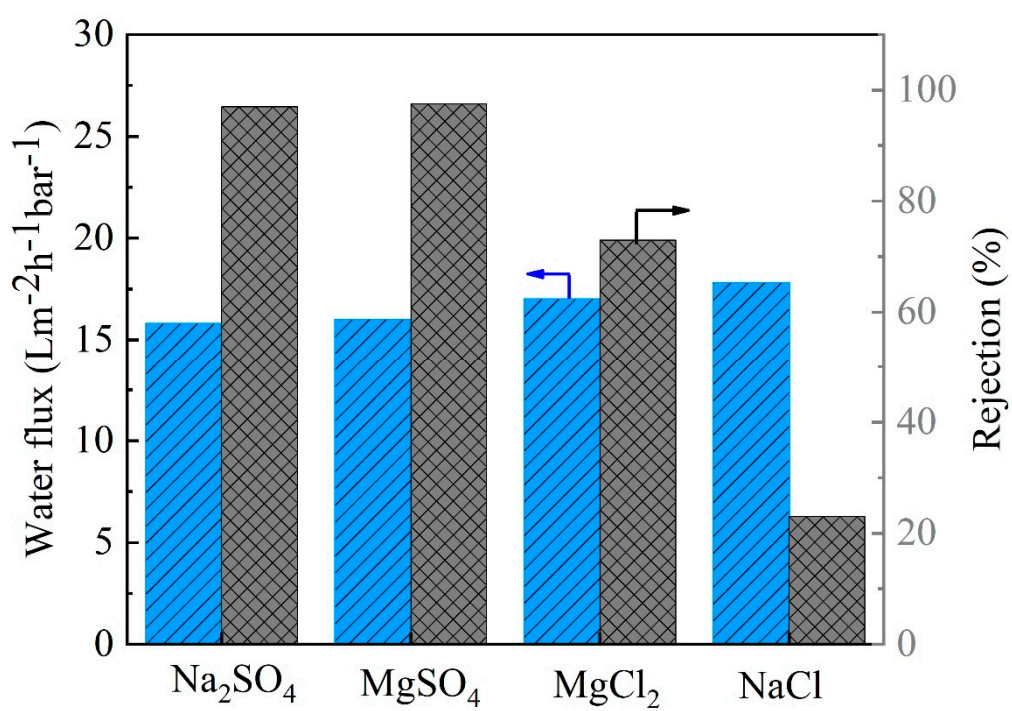

Supplementary **Figure S4**. The rejection of membrane TFC-3 to various salt solution.

Supplementary Table S1. Comparison of the result in this work with other results of report for Na<sub>2</sub>SO<sub>4</sub> separation performance.

| PA TFC membrane                 | Salt rejection (%) | Water flux (LMH bar <sup>-1</sup> ) | Ref       |
|---------------------------------|--------------------|-------------------------------------|-----------|
| MWCNTs/PSF support              | 75                 | 2.33                                | [1]       |
| CNTs/PA film                    | 99.1               | 25.1                                | [2]       |
| Modified-MWCNTs/PA film         | 99                 | 6.98                                | [3]       |
| Metal Organic Framework/PA film | 65                 | 39.5                                | [4]       |
| Control PA film                 | 97                 | 17.17                               | [4]       |
| Improve IP reaction             | 96                 | 34.7                                | [5]       |
| o-POPs/PA film                  | 94.9               | 29.6                                | [6]       |
| Reactable substrate             | 6.2                | 6.3                                 | [7]       |
| PDA@MWCNTs/PVDF Support         | 97                 | 15.8                                | This work |

## References

- [1] V. Vatanpour, S. S. Madaeni, R. Moradian, S. Zinadini, B. Astinchap, Fabrication and characterization of novel antifouling nanofiltration membrane prepared from oxidized multiwalled carbon nanotube/polyethersulfone nanocomposite, *J. Membr. Sci.* **2011**, 375, 284-294.
- [2] J. Zhu, J. Hou, R. Zhang, S. Yuan, J. Li. M. Tian. P. Wang, Y. Zhang, A, Volodin and B. V. Bruggen. Rapid water transport through controllable,

ultrathin polyamide nanofilms for high performance nanofiltration, *J. Mater. Chem. A*. **2018**, 6, 15701-1509.

[3] J. Shen, C. Yu, H. Ruan, C. Gao, B. V. Bruggen. Preparation and characterization of thin-film nanocomposite membranes embedded with poly(methyl methacrylate) hydrophobic modified multiwalled carbon nanotubes by interfacial polymerization, *J. Membr. Sci.* **2013**, (442), 18-26.

[4] R. Dai, H. Guo, C. Tang, M. Chen, J. Li, Z. Wang. Hydrophilic Selective Nanochannels Created by Metal Organic Frameworks in Nanofiltration Membranes Enhance Rejection of Hydrophobic Endocrine-Disrupting Compounds, *Environ. Sci. Technol.* **2019**, 53, 13776–13783.

[5] Y. Liu, J. Zhu, J. Zheng, X. Gao, J. Wang, X. Wang, Y. F. Xie, X. Huang and B. V. Bruggen, A Facile and Scalable Fabrication Procedure for Thin-Film Composite Membranes: Integration of Phase Inversion and Interfacial Polymerization. *Environ. Sci. Technol.* **2020**, 54, 1946–1954.

[6] Ya. Liu, J. Zhu, J. Zheng, X. Gao, M. Tian, X. Wang, Y. F. Xie, Y. Zhang, A. Volodin and B. V. Bruggen, Porous organic polymer embedded thin-film nanocomposite membranes for enhanced nanofiltration performance, *J. Membr. Sci.* **2020**, 602, 117982.

[7] Z. Yao, H. Guo, Z. Yang, C. Lin, B. Zhu, Y. Dong, C. Y. Tang, Reactable substrate participating interfacial polymerization for thin film composite membranes with enhanced salt rejection performance, *Desalination*, **2018**, 436, 1-7.
